# Supplementary material for: Synergistic anti-tumor efficacy of sorafenib and fluvastatin in hepatocellular carcinoma
Source: PubMed Central journal article supplement (PMC5410302; doi:10.18632/oncotarget.15575), 2017-02-21
Supplement: oncotarget-08-23265-s001.pdf [file oncotarget-08-23265-s001.pdf]

# Synergistic anti-tumor efficacy of sorafenib and fluvastatin in hepatocellular carcinoma

## Supplementary Materials

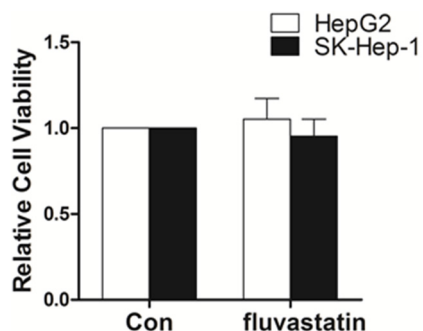

**Supplementary Figure 1:** HepG2 and SK-Hep-1 cells were incubated with 1 $\mu$ M fluvastatin or vehicle for 72 h. Cell viability was evaluated by CCK8 assays. \* $P < 0.05$  vs. control group. Data are expressed as the mean  $\pm$  SEM of three independent experiments.

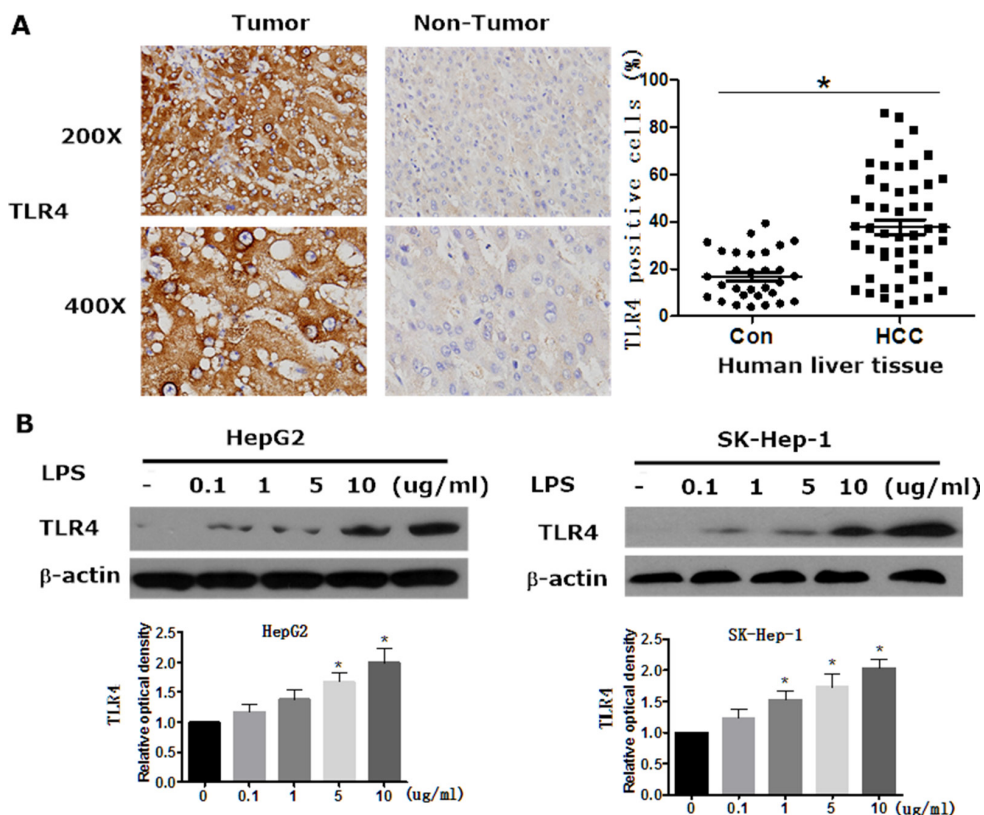

**Supplementary Figure 2:** (A) IHC staining of TLR4 in human HCC tissues and normal liver tissues. \* $P < 0.05$  vs. non-tumor samples. (B) The serum-starved HepG2 and SK-Hep-1 cell lines were treated with LPS (0, 0.1, 1, or 10  $\mu$ g/ml) for 24 h. The protein level of TLR4 was determined by western blot analysis. Data are expressed as the mean  $\pm$  SEM of three independent experiments. \* $P < 0.05$  vs control.

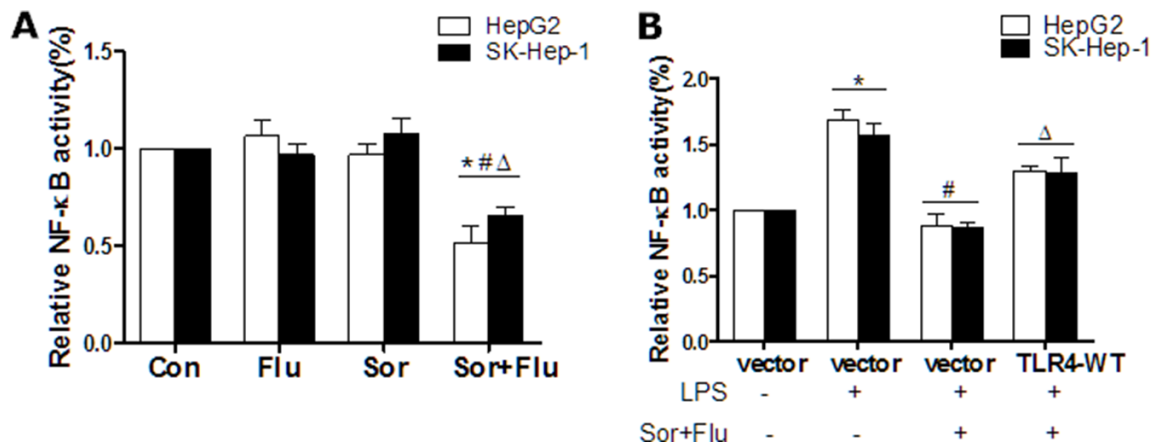

**Supplementary Figure 3:** (A) HepG2 and SK-Hep-1 cells were pretreated with sorafenib (1  $\mu$ M), fluvastatin (1  $\mu$ M) or both drugs for 24 h. The protein level of p65 in the nucleus was determined by ELISA. \* $P$  < 0.05 vs. Con, # $P$  < 0.05 vs. Flu and  $\Delta P$  < 0.05 vs. Sor. (B) HepG2 and SK-Hep-1 cells were transfected with control vector or TLR4-WT. Twenty-four hours after transfection, HCC cells were pre-treated with DMSO or sorafenib (1  $\mu$ M) plus fluvastatin (1  $\mu$ M) for 30 min and then induced with 10  $\mu$ g/mL LPS for 24 h. Changes in p65 activity were determined by ELISA. Data are expressed as the mean  $\pm$  SEM of three independent experiments. \* $P$  < 0.05 vs. control, # $P$  < 0.05 vs. LPS alone and  $\Delta P$  < 0.05 vs. LPS+Sor+Flu.

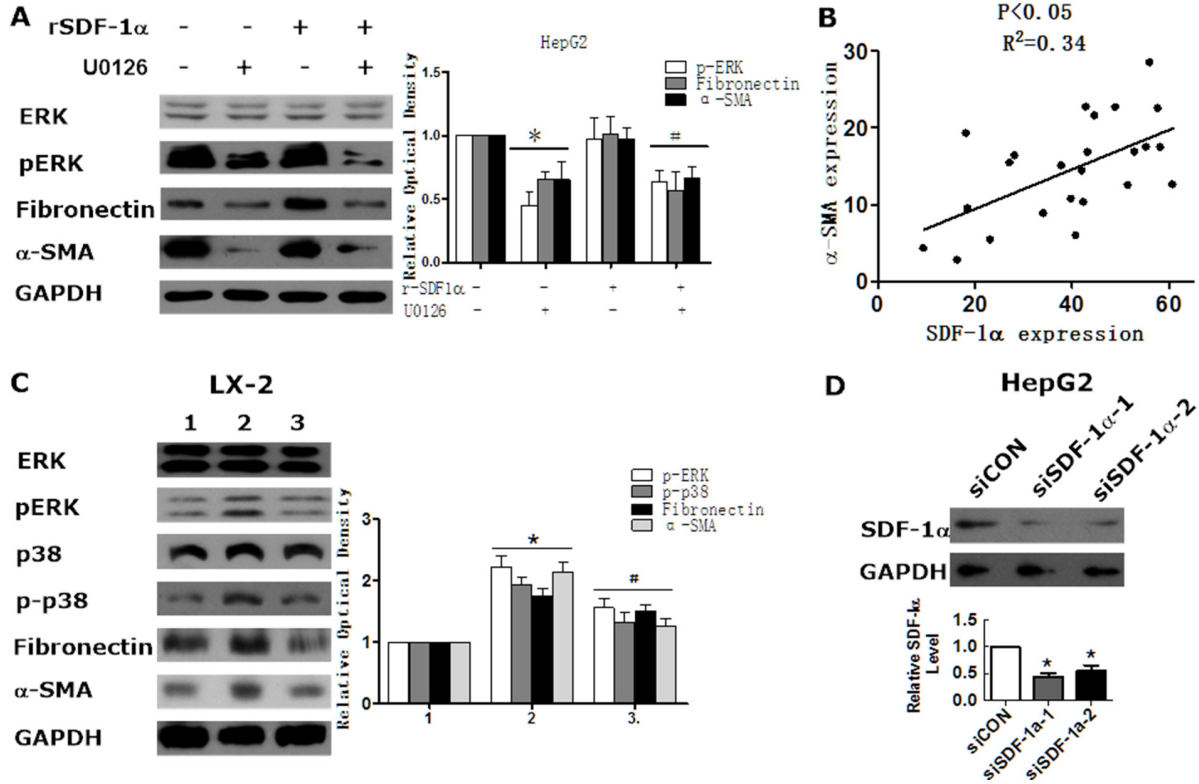

**Supplementary Figure 4:** (A) LX-2 cells were cultured with U0126 (2  $\mu$ M) or rSDF1- $\alpha$  (40 ng/ml) as indicated for 30 min and 24 h. The expressions of p-ERK, p-p38, fibronectin and  $\alpha$ -SMA were measured by western blotting. \* $P$  < 0.05 vs. control, # $P$  < 0.05 vs. rSDF1- $\alpha$  treated group. (B) The correlation between SDF-1 $\alpha$  and PCNA expression in liver tumor tissues of HCC rats was determined by Pearson's  $\chi^2$  test. (C) LX-2 cells were treated with control medium (lane 1), culture supernatant of HepG2 cells (lane 2), or supernatant of HepG2 cells plus neutralizing antibody of SDF-1 $\alpha$  (lane 3) for 30 min or 24 h. Western blot analysis was performed to detect the expression of p-ERK, p-p38 (30 min), ERK, p38, fibronectin and  $\alpha$ -SMA (24 h). \* $P$  < 0.05 compared to lane 1, # $P$  < 0.05 vs. lane 2. (D) HepG2 cells were transfected with control siRNA, SDF-1 $\alpha$  siRNA-1 and SDF-1 $\alpha$  siRNA-2. The protein level of SDF-1 $\alpha$  was detected by Western blotting. \* $P$  < 0.05 vs. siCON. Data are expressed as the mean  $\pm$  SEM of three independent experiments.

### Supplementary Table 1: Sequence of primers for qRT-PCR

| Gene         | Forward primer               | Reverse primer              |
|--------------|------------------------------|-----------------------------|
| <i>Tlr4</i>  | 5'- TGTATCGGTGGTCAGTGTGC -3' | 5'-CAGCTCGTTTCTCACCCAGT -3' |
| <i>Gapdh</i> | 5'-TGTTTCGTCATGGGTGTGAAC-3'  | 5'-ATGGCATGGACTGTGGTCAT-3'  |
